# Supplementary material
Source: PubMed Central journal article supplement (PMC7702274)
Supplement: media-2.pdf [file media-2.pdf]

Supplemental Table 1 - Direction and degree of change for all samples as in Barone et al. Figure 6\*

| Sample ID | Disease at day 0 | Sample source | Population analyzed | Total cells | Studied intervention | Outcome     | Day compared | # cells, [0,5] | # cells, [5,15] | # cells, [15,85] | # cells, [85,95] | # cells, [95,100] | # cells, total | Change magnitude | Change direction |
|-----------|------------------|---------------|---------------------|-------------|----------------------|-------------|--------------|----------------|-----------------|------------------|------------------|-------------------|----------------|------------------|------------------|
| RV001     | Healthy          | PBMC          | CD4+ T cells        | 1.37E+06    | Rhinovirus challenge | infected    | 7            | 9              | 885             | 1363363          | 2080             | 1155              | 1367492        | 0.09%            | 0.985            |
| RV002     | Healthy          | PBMC          | CD4+ T cells        | 2.48E+06    | Rhinovirus challenge | uninfected  | 7            | 9              | 329             | 2480954          | 0                | 0                 | 2481292        | 0.00%            | -1.000           |
| RV003     | Healthy          | PBMC          | CD4+ T cells        | 2.62E+06    | Rhinovirus challenge | uninfected  | 7            | 0              | 271             | 2613703          | 3615             | 1667              | 2619256        | 0.06%            | 1.000            |
| RV004     | Healthy          | PBMC          | CD4+ T cells        | 3.25E+06    | Rhinovirus challenge | infected    | 7            | 291            | 4103            | 3243461          | 1316             | 11                | 3249182        | 0.01%            | -0.927           |
| RV005     | Healthy          | PBMC          | CD4+ T cells        | 2.30E+06    | Rhinovirus challenge | infected    | 7            | 14             | 879             | 2303653          | 46               | 0                 | 2304592        | 0.00%            | -1.000           |
| RV006     | Healthy          | PBMC          | CD4+ T cells        | 1.53E+06    | Rhinovirus challenge | infected    | 7            | 0              | 280             | 1528931          | 1302             | 139               | 1530652        | 0.01%            | 1.000            |
| RV007     | Healthy          | PBMC          | CD4+ T cells        | 1.48E+06    | Rhinovirus challenge | infected    | 7            | 6168           | 6858            | 1467017          | 95               | 0                 | 1480138        | 0.42%            | -1.000           |
| RV008     | Healthy          | PBMC          | CD4+ T cells        | 1.16E+06    | Rhinovirus challenge | infected    | 7            | 0              | 71              | 1154970          | 622              | 341               | 1156004        | 0.03%            | 1.000            |
| COV24     | COVID-19         | PBMC          | All cells           | 6.34E+04    | N/A                  | ICU         | 3            | 3              | 1105            | 58091            | 3580             | 647               | 63426          | 1.025%           | 0.991            |
| COV26     | COVID-19         | PBMC          | All cells           | 1.19E+05    | N/A                  | ICU         | 6            | 4              | 338             | 111308           | 5389             | 2409              | 119448         | 2.020%           | 0.997            |
| COV27     | COVID-19         | PBMC          | All cells           | 4.90E+04    | N/A                  | ICU         | 1            | 12             | 1859            | 45592            | 1532             | 11                | 49006          | 0.047%           | -0.043           |
| COV29     | COVID-19         | PBMC          | All cells           | 1.64E+05    | N/A                  | ICU         | 4            | 12208          | 17659           | 113306           | 17287            | 3920              | 164380         | 9.811%           | -0.514           |
| COV32     | COVID-19         | PBMC          | All cells           | 3.21E+05    | N/A                  | non ICU     | 6            | 119305         | 18635           | 51651            | 31496            | 99643             | 320730         | 68.266%          | -0.090           |
| COV34     | COVID-19         | PBMC          | All cells           | 4.97E+05    | N/A                  | ICU         | 7            | 97380          | 70135           | 164237           | 99849            | 64921             | 496522         | 32.688%          | -0.200           |
| COV35     | COVID-19         | PBMC          | All cells           | 8.14E+04    | N/A                  | ICU         | 4            | 141            | 3044            | 74262            | 3341             | 610               | 81398          | 0.923%           | 0.625            |
| COV36     | COVID-19         | PBMC          | All cells           | 2.96E+05    | N/A                  | non ICU     | 5            | 5494           | 5497            | 271632           | 7703             | 6112              | 296438         | 3.915%           | 0.053            |
| COV37     | COVID-19         | PBMC          | All cells           | 5.81E+03    | N/A                  | ICU         | 5            | 1839           | 523             | 977              | 538              | 1937              | 5814           | 64.947%          | 0.026            |
| COV39     | COVID-19         | PBMC          | All cells           | 1.94E+05    | N/A                  | ICU         | 4            | 45209          | 12696           | 88567            | 30561            | 16717             | 193750         | 31.962%          | -0.460           |
| COV40     | COVID-19         | PBMC          | All cells           | 4.84E+04    | N/A                  | ICU         | 6            | 347            | 1477            | 42432            | 3151             | 959               | 48366          | 2.700%           | 0.469            |
| COV41     | COVID-19         | PBMC          | All cells           | 9.82E+04    | N/A                  | ICU         | 4            | 15488          | 9468            | 62216            | 8458             | 2598              | 98228          | 18.412%          | -0.713           |
| MB004     | Melanoma         | PBMC          | All cells           | 1.69E+05    | α-PD immunotherapy   | complete    | 3            | 4975           | 20025           | 115912           | 22236            | 5672              | 168820         | 6.307%           | 0.065            |
| MB005     | Melanoma         | PBMC          | All cells           | 1.54E+05    | α-PD immunotherapy   | complete    | 3            | 1117           | 1636            | 149069           | 2042             | 60                | 153924         | 0.765%           | -0.898           |
| MB006     | Melanoma         | PBMC          | All cells           | 1.92E+05    | α-PD immunotherapy   | progressive | 5            | 11418          | 4735            | 172333           | 3476             | 276               | 192238         | 6.083%           | -0.953           |
| MB007     | Melanoma         | PBMC          | All cells           | 1.72E+05    | α-PD immunotherapy   | progressive | 3            | 536            | 2916            | 168874           | 154              | 0                 | 172480         | 0.311%           | -1.000           |
| MB008     | Melanoma         | PBMC          | All cells           | 2.33E+05    | α-PD immunotherapy   | partial     | 3            | 5991           | 7137            | 211481           | 8094             | 491               | 233194         | 2.780%           | -0.849           |
| MB009     | Melanoma         | PBMC          | All cells           | 4.65E+05    | α-PD immunotherapy   | stable      | 3            | 1838           | 6903            | 455082           | 1401             | 0                 | 465224         | 0.395%           | -1.000           |
| MB010     | Melanoma         | PBMC          | All cells           | 3.94E+05    | α-PD immunotherapy   | partial     | 3            | 0              | 478             | 392391           | 851              | 20                | 393740         | 0.005%           | 1.000            |
| MB012     | Melanoma         | PBMC          | All cells           | 1.65E+05    | α-PD immunotherapy   | partial     | 3            | 459            | 6870            | 147120           | 7973             | 2306              | 164728         | 1.679%           | 0.668            |
| MB013     | Melanoma         | PBMC          | All cells           | 4.29E+05    | α-PD immunotherapy   | partial     | 6            | 56             | 579             | 424404           | 3654             | 449               | 429142         | 0.118%           | 0.778            |
| MB041     | Melanoma         | PBMC          | All cells           | 3.45E+05    | α-PD immunotherapy   | progressive | 3            | 0              | 0               | 344611           | 13               | 0                 | 344624         | 0.000%           | 0.000            |
| AML001    | AML              | PBMC          | All cells           | 6.31E+04    | Chemotherapy         | CR          | 5            | 31498          | 7               | 131              | 161              | 31341             | 63138          | 99.526%          | -0.002           |
| AML002    | AML              | PBMC          | All cells           | 7.40E+04    | Chemotherapy         | CR          | 8            | 29663          | 5074            | 5134             | 3878             | 30209             | 73958          | 80.954%          | 0.009            |
| AML003    | AML              | PBMC          | All cells           | 6.83E+05    | Chemotherapy         | PD          | 5            | 1667           | 48603           | 556652           | 55640            | 20082             | 682644         | 3.186%           | 0.847            |
| AML004    | AML              | PBMC          | All cells           | 3.41E+05    | Chemotherapy         | CR          | 8            | 139293         | 21982           | 25628            | 16694            | 137025            | 340622         | 81.122%          | -0.008           |
| AML007    | AML              | PBMC          | All cells           | 1.94E+05    | Chemotherapy         | CR          | 8            | 6203           | 14309           | 144865           | 22967            | 5370              | 193714         | 5.974%           | -0.072           |

\*For studied interventions and outcomes, see original manuscripts for detailed information. Day compared indicates the actual day a sample was taken relative to a day 0 comparison in all cases. #cells indicates the number of cells in each percentile grouping (e.g. [0,5] indicates the number of cells whose KNN area had less than or equal to 5% change in T-REX analysis). Change magnitude and direction are as in Figure 6A.
