# Supplementary material
Source: PubMed Central journal article supplement (PMC7702274)
Supplement: media-3.pdf [file media-3.pdf]

Supplemental Table 2a - MEM Labels for Enriched Features in All Cell Hotspots from COVID-19 Patients in Dataset 2

| patient_id | degree_change | direction_change                                                                                   | DBSCAN_cluster | total_counts | Marker Enrichment Modeling (MEM) Label                                                                                                                                                      |
|------------|---------------|----------------------------------------------------------------------------------------------------|----------------|--------------|---------------------------------------------------------------------------------------------------------------------------------------------------------------------------------------------|
| COV24      | 1.025         | 0.991                                                                                              | 1              | 85           | 2401095 : ▲ CD147+6 CD99+6 CD29+5 CD38+4 CD3+3 CD49d+2 CD81+2 CD52+2 CD27+2 CD28+2 CD55+1 CD62L+1 CD56+1 CD5+1 CD4+1 ▼ None                                                                 |
|            |               |                                                                                                    | 2              | 174          | 2402095 : ▲ CD9+5 CD29+5 CD147+4 CD99+4 IgD+1 CD55+1 CX3CR1+1 CD34+1 ▼ None                                                                                                                 |
|            |               |                                                                                                    | 3              | 157          | 2403095 : ▲ CD147+5 CD9+4 CD29+3 CD81+2 Siglec-8+2 CD39+2 CD55+1 CD123+1 CD24+1 CD99+1 CD8a+1 ▼ None                                                                                        |
|            |               |                                                                                                    | 4              | 54           | 2404095 : ▲ CD147+6 CD99+6 CD29+4 CD38+4 CD8a+4 CD49d+2 CD3+2 CD27+2 CD39+2 CD81+1 CD52+1 CD55+1 CD56+1 ▼ None                                                                              |
|            |               |                                                                                                    | 5              | 135          | 2405095 : ▲ CD147+6 CD29+5 CD56+5 CD99+5 CD38+4 CD49d+2 CD81+2 CD7+2 CD52+1 CD55+1 CD8a+1 ▼ None                                                                                            |
| COV26      | 2.020         | 0.997                                                                                              | 1              | 1062         | 2601095 : ▲ CD147+6 CD99+5 CD29+4 CD38+3 CD55+2 CD14+2 CD64+1 CD56+1 CD39+1 ▼ None                                                                                                          |
|            |               |                                                                                                    | 2              | 974          | 2602095 : ▲ CD9+4 CD147+4 CD81+1 CD55+1 Siglec-8+1 CD29+1 CD8a+1 ▼ None                                                                                                                     |
|            |               |                                                                                                    | 3              | 163          | 2603095 : ▲ CD9+7 CD29+6 CD147+5 CD99+5 CX3CR1+4 CD34+2 IgD+1 CD43+1 CD45RB+1 CD55+1 CD20+1 CD24+1 CD56+1 ▼ None                                                                            |
|            |               |                                                                                                    | 4              | 58           | 2604095 : ▲ CD147+6 CD29+3 CD55+2 CD99+2 CD49d+1 CD52+1 CD56+1 ▼ None                                                                                                                       |
|            |               |                                                                                                    | 5              | 97           | 2605095 : ▲ CD38+5 CD147+5 CD123+4 CD55+2 CD99+2 CD9+1 CD62L+1 CD8a+1 ▼ None                                                                                                                |
| COV27      | 0.047         | -0.043                                                                                             | 1              | 8            | 270105 : ▲ CD147+7 CD99+6 CD29+4 CD64+3 CD38+3 CD55+2 CD14+2 CD56+2 CD62L+1 CD39+1 CD8a+1 ▼ None                                                                                            |
|            |               |                                                                                                    | 2              | 4            | 270205 : ▲ CD99+6 CD57+4 CD147+4 CD45RA+3 CD56+3 CD29+2 CD38+2 CD43+1 CD81+1 CD8a+1 ▼ None                                                                                                  |
|            |               |                                                                                                    | 3              | 8            | 2703095 : ▲ CD147+4 CD16+3 CD24+2 CD55+1 CD29+1 CD38+1 CD39+1 ▼ None                                                                                                                        |
|            |               |                                                                                                    | 4              | 2            | 2704095 : ▲ CD147+4 CD16+2 CD55+1 CD24+1 CD56+1 CD99+1 CD39+1 CD8a+1 ▼ None                                                                                                                 |
| COV29      | 9.811         | -0.514                                                                                             | 1              | 11879        | 290105 : ▲ CD16+5 CD147+4 CD55+3 CD24+3 CD29+2 CD127+2 CD39+2 CD45+1 CD38+1 CD8a+1 ▼ None                                                                                                   |
|            |               |                                                                                                    | 2              | 284          | 290205 : ▲ CD147+6 CD16+6 CD55+4 CD24+4 CD29+3 CD127+3 CD39+3 CD38+2 CD45+1 CD33+1 CD11c+1 CD43+1 CD64+1 CD62L+1 CD56+1 CD99+1 CD8a+1 ▼ None                                                |
|            |               |                                                                                                    | 3              | 2495         | 2903095 : ▲ CD147+4 CD55+2 CD29+2 CD24+2 CD39+2 CD16+2 CD38+1 ▼ None                                                                                                                        |
|            |               |                                                                                                    | 4              | 192          | 2904095 : ▲ CD147+4 CD29+2 CD64+1 CD24+1 CD39+1 CD8a+1 ▼ None                                                                                                                               |
|            |               |                                                                                                    | 5              | 759          | 2905095 : ▲ CD9+4 CD147+4 Siglec-8+3 CD81+2 CD29+2 CD39+2 CD45+1 CD55+1 CD34+1 CD127+1 CD24+1 CD38+1 CD99+1 CD8a+1 ▼ None                                                                   |
|            |               |                                                                                                    | 6              | 246          | 2906095 : ▲ CD147+6 CD9+4 CD55+3 Siglec-8+3 CD29+3 CD24+3 CD39+3 CD16+3 CD81+2 CD38+2 CD45+1 CD11c+1 CD43+1 CD34+1 CD62L+1 CD127+1 CD56+1 CD99+1 CD8a+1 ▼ None                              |
| COV32      | 68.266        | -0.090                                                                                             | 1              | 99147        | 320105 : ▲ CD147+5 CD55+3 CD16+3 CD29+2 CD24+2 CD39+2 CD62L+1 CD38+1 CD56+1 ▼ None                                                                                                          |
|            |               |                                                                                                    | 2              | 5835         | 320205 : ▲ CD147+6 CD55+4 CD24+4 CD16+4 CD29+3 CD39+3 CD62L+2 CD45+1 CD11c+1 CD43+1 CD64+1 CD38+1 CD56+1 CD99+1 CD8a+1 ▼ None                                                               |
|            |               |                                                                                                    | 3              | 165          | 320305 : ▲ CD147+5 CD55+3 CD29+3 CD16+3 CD9+2 CD24+2 CD39+2 CD62L+1 CD38+1 CD99+1 CD8a+1 ▼ None                                                                                             |
|            |               |                                                                                                    | 4              | 10719        | 320405 : ▲ CD147+6 CD29+5 CD55+4 CD38+4 CD99+4 CD64+3 CD14+3 CD45+2 CD11c+2 CD62L+2 CD56+2 CD39+2 CD33+1 HLA-DR+1 CD49d+1 CD137+1 CD141+1 CD85j+1 ▼ None                                    |
|            |               |                                                                                                    | 5              | 765          | 320505 : ▲ CD123+8 Siglec-8+8 CD127+8 CD28+8 CD43+5 CD147+5 CD55+3 CD39+3 CD16+3 CD20+2 CD29+2 CD24+2 CD62L+1 CD38+1 CD56+1 ▼ None                                                          |
|            |               |                                                                                                    | 6              | 937          | 320605 : ▲ CD147+7 CD55+5 CD29+5 CD38+5 CD99+4 CD16+4 CD64+3 CD14+3 CD45+2 CD11c+2 CD62L+2 CD56+2 CD33+1 HLA-DR+1 CD49d+1 CD43+1 CD52+1 CD137+1 CD141+1 CD85j+1 CD8a+1 ▼ None               |
|            |               |                                                                                                    | 7              | 1014         | 320705 : ▲ CD147+5 CD9+4 Siglec-8+3 CD81+2 CD29+2 CD24+2 CD39+2 CD45+1 CD49d+1 CD55+1 CD34+1 CD127+1 CD127+1 CD38+1 CD56+1 CD99+1 CD8a+1 ▼ None                                             |
|            |               |                                                                                                    | 8              | 435          | 320805 : ▲ CD57+4 CD3+4 CD45RA+4 CD29+3 CD38+3 CD147+3 CD99+3 CD45+2 CD43+2 CD81+2 CD56+2 CD8a+2 CD11c+1 CD49d+1 CD52+1 CD161+1 ▼ None                                                      |
|            |               |                                                                                                    | 9              | 116          | 320905 : ▲ CD57+5 CD29+4 CD3+3 CD147+3 CD99+3 CD45+2 CD43+2 CD81+2 CD52+2 CD49d+1 CD38+1 CD8a+1 CD5+1 ▼ None                                                                                |
|            |               |                                                                                                    | 10             | 12           | 3202095 : ▲ CD147+7 CD24+5 CD16+5 CD55+4 CD29+4 CD39+4 CD45+2 CD11c+2 CD38+2 CD56+2 CD43+1 CD64+1 CD9+1 CD62L+1 CD127+1 CD99+1 CD8a+1 ▼ None                                                |
|            |               |                                                                                                    | 11             | 76142        | 3203095 : ▲ CD147+4 CD24+3 CD16+3 CD55+2 CD29+2 CD39+2 CD45+1 CD11c+1 CD38+1 ▼ None                                                                                                         |
|            |               |                                                                                                    | 12             | 493          | 3205095 : ▲ CD123+8 Siglec-8+8 CD127+8 CD28+8 CD43+5 CD147+4 CD20+3 CD24+3 CD39+3 CD16+3 CD55+2 CD29+2 CD45+1 CD11c+1 CD9+1 ▼ None                                                          |
|            |               |                                                                                                    | 13             | 1802         | 3206095 : ▲ CD147+7 CD29+5 CD99+5 CD55+4 CD38+4 CD16+4 CD11c+3 CD9+3 CD14+3 CD24+3 CD39+3 CD45+2 CD64+2 CD56+2 CD33+1 HLA-DR+1 CD49d+1 CD52+1 CD137+1 CD62L+1 CD141+1 CD85j+1 CD8a+1 ▼ None |
|            |               |                                                                                                    | 14             | 1307         | 3207095 : ▲ CD9+5 CD147+5 CD81+3 Siglec-8+3 CD29+3 CD24+3 CD45+2 CD55+2 CD99+2 CD39+2 CD11c+1 CD52+1 CD34+1 CD38+1 CD56+1 CD99+1 CD8a+1 ▼ None                                              |
|            |               |                                                                                                    | 15             | 572          | 3208095 : ▲ CD57+5 CD45RA+5 CD99+5 CD3+4 CD147+4 CD29+3 CD56+3 CD8a+3 CD45+2 CD43+2 CD81+2 CD38+2 CD11c+1 CD49d+1 CD52+1 CD161+1 CD7+1 ▼ None                                               |
| COV34      | 32.688        | -0.200                                                                                             | 1              | 92331        | 3401095 : ▲ CD29+5 CD147+5 CD38+4 CD56+4 CD99+4 CD45+2 CD49d+2 CD81+2 CD52+2 CD43+1 CD55+1 CD161+1 CD137+1 CD62L+1 CD45RA+1 CD8a+1 CD7+1 ▼ None                                             |
|            |               |                                                                                                    | 2              | 370          | 340205 : ▲ CD147+6 CD29+5 CD99+4 CD11c+3 CD55+3 CD9+3 CD14+3 CD38+3 CD45+2 CD64+2 CD56+2 CD39+2 CD33+1 CD137+1 CD62L+1 CD56+1 CD5+1 CD4+1 ▼ None                                            |
|            |               |                                                                                                    | 3              | 935          | 340305 : ▲ CD147+4 CD24+4 CD16+4 CD55+3 CD29+3 CD39+2 CD45+1 CD11c+1 CD38+1 ▼ None                                                                                                          |
|            |               |                                                                                                    | 4              | 1762         | 340405 : ▲ CD147+6 CD29+5 CD55+4 CD38+4 CD99+4 CD64+3 CD14+3 CD62L+3 CD56+2 CD39+2 CD45+1 CD11c+1 CD137+1 CD141+1 CD85j+1 CD8a+1 ▼ None                                                     |
|            |               |                                                                                                    | 5              | 340          | 340505 : ▲ CD147+5 CD55+4 CD24+4 CD16+4 CD29+3 CD127+2 CD39+2 CD8a+2 CD45+1 CD43+1 CD64+1 CD62L+1 CD38+1 CD56+1 CD99+1 ▼ None                                                               |
|            |               |                                                                                                    | 6              | 704          | 340705 : ▲ CD147+4 CD55+2 CD29+2 CD24+1 CD56+1 CD99+1 CD39+1 CD8a+1 CD16+1 ▼ None                                                                                                           |
|            |               |                                                                                                    | 7              | 907          | 340805 : ▲ CD38+4 CD99+4 CD29+3 CD45RA+3 CD147+3 CD57+2 CD56+2 CD45+1 CD43+1 CD81+1 CD8a+1 ▼ None                                                                                           |
|            |               |                                                                                                    | 8              | 11           | 340905 : ▲ CD57+4 CD99+4 CD29+3 CD147+3 CD8a+3 CD38+2 CD45+1 CD49d+1 CD43+1 CD3+1 CD81+1 CD52+1 CD45RA+1 CD5+1 ▼ None                                                                       |
|            |               |                                                                                                    | 9              | 177          | 3403095 : ▲ CD147+5 CD24+4 CD16+4 CD55+3 CD29+3 CD39+2 CD45+1 CD43+1 CD64+1 CD62L+1 CD38+1 CD56+1 CD8a+1 ▼ None                                                                             |
|            |               |                                                                                                    | 10             | 59047        | 3406095 : ▲ CD147+4 CD16+4 CD55+3 CD29+2 CD24+2 CD62L+1 CD38+1 CD56+1 CD39+1 CD8a+1 ▼ None                                                                                                  |
|            |               |                                                                                                    | 11             | 299          | 3408095 : ▲ CD45RA+5 CD99+5 CD57+4 CD29+4 CD38+4 CD147+4 CD56+4 CD43+2 CD8a+2 CD45+1 CD49d+1 CD81+1 CD161+1 CD7+1 ▼ None                                                                    |
|            |               |                                                                                                    | 12             | 786          | 3409095 : ▲ CD57+5 CD99+5 CD29+4 CD8a+4 CD147+3 CD45+2 CD43+2 CD3+2 CD81+2 CD45RA+2 CD49d+1 CD52+1 CD5+1 ▼ None                                                                             |
|            |               |                                                                                                    | 13             | 893          | 3401095 : ▲ CD9+4 CD29+4 CD55+3 CD147+3 CD99+3 CD43+1 CD64+1 CX3CR1+1 CD34+1 CD24+1 CD56+1 ▼ None                                                                                           |
|            |               |                                                                                                    | 14             | 941          | 34011095 : ▲ CD9+4 CD147+4 CD29+3 CD81+2 CD55+2 Siglec-8+2 CD8a+2 CD45+1 CD34+1 CD127+1 CD24+1 CD38+1 CD56+1 CD99+1 CD39+1 ▼ None                                                           |
|            |               |                                                                                                    | 15             | 1338         | 34012095 : ▲ CD147+6 CD29+5 CD99+5 CD55+3 CD38+3 CD62L+2 CD56+2 CD45+1 CD64+1 CD14+1 CD137+1 CD141+1 CD39+1 CD8a+1 ▼ None                                                                   |
| 16         | 312           | 34013095 : ▲ CD147+5 CD55+3 CD29+3 CD62L+2 CD24+2 CD16+2 CD38+1 CD56+1 CD99+1 CD39+1 CD8a+1 ▼ None |                |              |                                                                                                                                                                                             |
| COV35      | 0.923         | 0.625                                                                                              | 1              | 36           | 350105 : ▲ CD147+5 CD55+3 CD62L+1 CD24+1 CD16+1 ▼ None                                                                                                                                      |
|            |               |                                                                                                    | 2              | 92           | 350205 : ▲ CD99+5 CD45RA+4 CD57+3 CD147+2 CD56+2 CD43+1 CD29+1 CD38+1 CD8a+1 ▼ None                                                                                                         |
|            |               |                                                                                                    | 3              | 204          | 3503095 : ▲ CD9+5 CD147+5 CD81+2 CD55+1 Siglec-8+1 CD29+1 CD127+1 CD24+1 CD39+1 CD8a+1 ▼ None                                                                                               |
|            |               |                                                                                                    | 4              | 202          | 3504095 : ▲ CD9+5 CD29+5 CD147+3 CD99+2 CX3CR1+1 ▼ None                                                                                                                                     |
|            |               |                                                                                                    | 5              | 194          | 3505095 : ▲ CD9+7 CD29+6 CD147+5 CD99+4 CD55+2 CD34+2 CX3CR1+1 CD38+1 CD56+1 ▼ None                                                                                                         |
| COV36      | 3.915         | 0.053                                                                                              | 1              | 2378         | 360105 : ▲ CD147+6 CD29+5 CD55+4 CD38+4 CD14+3 CD99+3 CD45+2 CD11c+2 CD64+2 CD33+1 HLA-DR+1 CD62L+1 CD56+1 CD39+1 ▼ None                                                                    |
|            |               |                                                                                                    | 2              | 2310         | 360205 : ▲ CD9+3 CD29+3 IgD+1 CX3CR1+1 CD24+1 CD147+1 CD99+1 ▼ None                                                                                                                         |
|            |               |                                                                                                    | 3              | 352          | 360305 : ▲ CD55+4 CD147+4 CD24+2 CD45+1 CD64+1 CD29+1 CD62L+1 CD39+1 CD16+1 ▼ None                                                                                                          |
|            |               |                                                                                                    | 4              | 421          | 360405 : ▲ CD147+4 CD55+3 CD24+3 CD16+3 CD127+2 CD45+1 CD29+1 CD39+1 ▼ None                                                                                                                 |
|            |               |                                                                                                    | 5              | 2152         | 3605095 : ▲ CD147+6 CD29+5 CD99+5 CD38+3 CD45+2 CD11c+2 CD55+2 CD14+2 CD39+2 CD33+1 HLA-DR+1 CD64+1 CD9+1 CD56+1 ▼ None                                                                     |
| COV37      | 64.947        | 0.026                                                                                              | 1              | 1410         | 370105 : ▲ CD147+4 CD55+2 CD24+1 CD16+1 ▼ None                                                                                                                                              |
|            |               |                                                                                                    | 2              | 229          | 370205 : ▲ CD99+4 CD3+2 CD52+1 CD29+1 CD27+1 CD147+1 ▼ None                                                                                                                                 |
|            |               |                                                                                                    | 3              | 113          | 370305 : ▲ CD38+5 CD147+3 CD99+3 CD29+1 CD45RA+1 CD56+1 ▼ None                                                                                                                              |
|            |               |                                                                                                    | 4              | 77           | 370405 : ▲ CD147+6 CD55+4 CD29+3 CD38+3 CD64+2 CD99+2 CD14+1 CD56+1 CD39+1 ▼ None                                                                                                           |
|            |               |                                                                                                    | 5              | 1639         | 3705095 : ▲ CD147+4 CD9+3 CD81+1 Siglec-8+1 CD29+1 CD127+1 CD39+1 CD8a+1 ▼ None                                                                                                             |
|            |               |                                                                                                    | 6              | 254          | 3706095 : ▲ CD9+10 CD29+9 CD147+8 CD99+7 CD34+6 CD55+5 CD20+4 CD56+4 CD137+3 CD38+2 CX3CR1+1 ▼ None                                                                                         |
| COV39      | 31.962        | -0.460                                                                                             | 1              | 24346        | 390105 : ▲ CD147+5 CD16+5 CD55+4 CD45+1 CD64+1 CD29+1 CD62L+1 CD24+1 CD39+1 ▼ None                                                                                                          |
|            |               |                                                                                                    | 2              | 17959        | 390205 : ▲ CD9+4 CD29+4 CD147+2 IgD+1 CD99+1 ▼ None                                                                                                                                         |
|            |               |                                                                                                    | 3              | 1198         | 390405 : ▲ CD29+5 CD147+5 CD55+4 CD9+4 CD16+4 CD24+2 CD45+1 CD11c+1 IgD+1 CD64+1 CX3CR1+1 CD62L+1 CD38+1 CD99+1 CD39+1 ▼ None                                                               |
|            |               |                                                                                                    | 4              | 1173         | 390505 : ▲ CD147+7 CD99+5 CD29+4 CD38+4 CD55+3 CD64+3 CD45+1 CD11c+1 CD14+1 CD62L+1 CD56+1 CD39+1 ▼ None                                                                                    |
|            |               |                                                                                                    | 5              | 194          | 3901095 : ▲ CD99+6 CD29+5 CD147+5 CD45+3 CD27+3 CD3+2 CD52+2 CD38+2 CD28+2 CD49d+1 CD5+1 ▼ None                                                                                             |
|            |               |                                                                                                    | 6              | 222          | 39011095 : ▲ CD9+5 CD147+3 CD29+2 CD45+1 CD81+1 Siglec-8+1 CD39+1 ▼ None                                                                                                                    |
|            |               |                                                                                                    | 7              | 7            | 3901105 : ▲ CD147+4 CD9+3 CD45+1 CD81+1 CD55+1 Siglec-8+1 CD29+1 CD24+1 CD39+1 ▼ None                                                                                                       |
|            |               |                                                                                                    | 8              | 9986         | 3903095 : ▲ CD147+4 CD55+1 CD29+1 CD24+1 CD16+1 ▼ None                                                                                                                                      |
|            |               |                                                                                                    | 9              | 1930         | 3906095 : ▲ CD147+4 CD29+1 ▼ None                                                                                                                                                           |
| COV40      | 2.700         | 0.469                                                                                              | 1              | 228          | 400105 : ▲ CD147+6 CD55+4 CD29+4 CD38+4 CD99+3 CD64+2 CD62L+2 CD45+1 ▼ None                                                                                                                 |
|            |               |                                                                                                    | 2              | 52           | 400205 : ▲ CD147+8 CD38+7 CD29+6 CD39+6 CD45RA+5 CD99+5 CD27+4 CD45+2 HLA-DR+1 CD49d+1 CD81+1 CD62L+1 ▼ None                                                                                |
|            |               |                                                                                                    | 3              | 748          | 4003095 : ▲ CX3CR1+6 CD9+6 CD29+6 CD147+3 IgD+2 CD99+2 CD33+1 CD11c+1 HLA-DR+1 CD24+1 ▼ None                                                                                                |
|            |               |                                                                                                    | 4              | 57           | 4004095 : ▲ CX3CR1+5 CD9+4 CD29+3 IgD+2 CD11c+1 CD147+1 ▼ None                                                                                                                              |
|            |               |                                                                                                    | 5              | 52           | 4005095 : ▲ CX3CR1+4 IgD+2 CD9+2 CD11c+1 CD29+1 ▼ None                                                                                                                                      |
| COV41      | 18.412        | -0.713                                                                                             | 1              | 10355        | 410105 : ▲ CD147+5 CD16+5 CD55+3 CD24+2 CD45+1 CD64+1 CD29+1 CD62L+1 CD39+1 ▼ None                                                                                                          |
|            |               |                                                                                                    | 2              | 3930         | 410205 : ▲ CD9+2 CD29+2 IgD+1 CX3CR1+1 CD147+1 ▼ None                                                                                                                                       |
|            |               |                                                                                                    | 3              | 493          | 410305 : ▲ CD24+3 CD147+3 CD55+2 CD29+1 CD62L+1 CD39+1 CD16+1 ▼ None                                                                                                                        |
|            |               |                                                                                                    | 4              | 404          | 410405 : ▲ CD147+5 CD55+3 CD24+2 CD16+2 CD64+1 CD29+1 CD39+1 ▼ None                                                                                                                         |
|            |               |                                                                                                    | 5              | 211          | 410505 : ▲ CD147+6 CD29+5 CD99+5 CD55+3 CD64+3 CD38+3 CD45+1 CD14+1 CD56+1 CD39+1 ▼ None                                                                                                    |
|            |               |                                                                                                    | 6              | 70           | 410605 : ▲ CD147+5 CD55+4 CD24+3 CD16+3 CD29+2 CD45+1 CD64+1 CD62L+1 CD39+1 ▼ None                                                                                                          |
|            |               |                                                                                                    | 7              | 1362         | 4107095 : ▲ CD9+5 CD147+4 CD81+2 Siglec-8+2 CD29+2 CD45+1 CD55+1 CD24+1 CD99+1 CD39+1 ▼ None                                                                                                |
|            |               |                                                                                                    | 8              | 876          | 4108095 : ▲ CD147+6 CD29+4 CD11c+3 CD45+2 CD55+2 HLA-DR+1 CD49d+1 CD64+1 CD14+1 CD38+1 CD56+1 CD99+1 CD39+1 ▼ None                                                                          |
|            |               |                                                                                                    | 9              | 117          | 4109095 : ▲ CD147+6 CD29+5 CD99+5 CD38+4 CD45+3 CD8a+3 CD49d+2 CD3+2 CD81+1 CD52+1 CD55+1 CD62L+1 CD56+1 ▼ None                                                                             |
|            |               |                                                                                                    | 10             | 93           | 4101095 : ▲ CD9+5 CD147+5 CD55+3 CD24+3 CD16+3 CD81+2 CD29+2 CD39+2 CD45+1 CD64+1 Siglec-8+1 CD38+1 CD99+1 ▼ None                                                                           |

\*Red MEM labels denote that the cell hotspot is a region with ≥95% expansion and blue MEM labels denote that the cell hotspot is a region with ≥95% contraction after T-REX analysis when comparing Day 0 to Day 4 (±3 days)
