# Supplementary material
Source: PubMed Central journal article supplement (PMC7702274)
Supplement: media-4.pdf [file media-4.pdf]

Supplemental Table 2b - MEM Labels for Enriched Features in CD4+ T cell Hotspots from COVID-19 Patients in Dataset 2

| patient_id | degree_change | direction_change | DBSCAN_cluster | total_counts | Marker Enrichment Modeling (MEM) Label                                                                                                                                                   |
|------------|---------------|------------------|----------------|--------------|------------------------------------------------------------------------------------------------------------------------------------------------------------------------------------------|
| COV24      | 2.053         | 1.000            | 1              | 81           | 2401095 : ▲ CD147+10 CD99+9 CD29+8 CD38+6 CD49d+4 CD3+4 CD81+2 CD52+2 CD56+2 CD28+2 CD55+1 CD137+1 CD62L+1 CD5+1 CD4+1 ▼ None                                                            |
|            |               |                  | 2              | 1            | 2402095 : ▲ CD99+10 CD147+9 CD29+8 CD3+5 CD27+5 CD38+5 CD28+3 CD81+2 CD52+2 CD62L+2 CD56+2 CD5+2 CD45+1 CD43+1 CD45RB+1 CD7+1 CD4+1 ▼ None                                               |
| COV26      | N/A           | N/A              | N/A            | N/A          | N/A                                                                                                                                                                                      |
| COV27      | N/A           | N/A              | N/A            | N/A          | N/A                                                                                                                                                                                      |
| COV29      | 1.464         | 1.000            | 1              | 22           | 2901095 : ▲ CD147+10 CD29+8 CD99+8 CD38+7 CD49d+5 CD3+5 CD39+5 CD45+4 CD81+4 CD62L+4 CD28+4 CD55+3 CD56+3 HLA-DR+2 CD52+2 CD25+2 CD137+2 CD43+1 CD161+1 CD27+1 CD8a+1 CD5+1 CD4+1 ▼ None |
|            |               |                  | 2              | 186          | 2902095 : ▲ CD147+8 CD29+7 CD99+7 CD27+5 CD38+5 CD45+4 CD3+4 CD49d+3 CD52+3 CD28+3 CD81+2 CD62L+2 CD56+2 CD5+2 HLA-DR+1 CD43+1 CD55+1 CD161+1 CD137+1 CD8a+1 CD4+1 ▼ None                |
| COV32      | 23.022        | -0.045           | 1              | 282          | 320105 : ▲ CD3+6 CD27+5 CD45RA+5 CD45+4 CD147+4 CD52+3 CD55+3 CD99+3 CD43+2 CD45RB+2 CD81+2 CD29+2 CD62L+2 CD127+2 CD38+2 CD5+2 CD28+1 CD8a+1 CD4+1 ▼ None                               |
|            |               |                  | 2              | 506          | 320205 : ▲ CD57+6 CD29+6 CD99+6 CD43+5 CD3+5 CD147+5 CD45+4 CD45RA+4 CD81+3 CD52+3 CD49d+2 CD5+2 CD45RB+1 CD127+1 CD38+1 CD56+1 CD8a+1 CD4+1 ▼ None                                      |
|            |               |                  | 3              | 45           | 320305 : ▲ CD45+5 CD29+5 CD27+5 CD147+5 CD3+4 CD52+4 CD99+4 CD127+3 CD43+2 CD81+2 CD62L+2 CD5+2 CD45RB+1 CD55+1 CD38+1 CD28+1 CD8a+1 CD7+1 CD4+1 ▼ None                                  |
|            |               |                  | 5              | 73           | 320505 : ▲ CD29+7 CD147+5 CD99+5 CD45+4 CD43+4 CD3+4 CD81+3 CD52+3 CD127+3 CD49d+2 CD5+2 CD161+1 CD137+1 CD56+1 CD8a+1 CD4+1 ▼ None                                                      |
|            |               |                  | 7              | 42           | 320705 : ▲ CD147+10 CD99+6 CD39+6 CD3+5 CD29+5 CD45+4 CD52+3 CD25+3 CD27+3 CD28+3 CD62L+2 CD38+2 CD56+2 CD5+2 CD43+1 CD55+1 CD4+1 ▼ None                                                 |
|            |               |                  | 4              | 73           | 3204095 : ▲ CD99+9 CD57+8 CD29+8 CD43+6 CD147+6 CD5+5 CD45+4 CD3+4 CD81+4 CD52+4 CD49d+3 CD45RB+1 CD161+1 CD137+1 CD127+1 CD56+1 CD8a+1 CD4+1 ▼ None                                     |
|            |               |                  | 6              | 292          | 3206095 : ▲ CD99+10 CD29+9 CD147+9 CD27+7 CD45+5 CD3+5 CD52+5 CD38+5 CD49d+4 CD28+4 CD43+2 CD81+2 CD62L+2 CD56+2 CD5+2 CD4+2 CD45RB+1 CD55+1 CD161+1 CD137+1 CD127+1 CD8a+1 CD7+1 ▼ None |
|            |               |                  | 8              | 40           | 3208095 : ▲ CD99+7 CD3+6 CD27+6 CD147+5 CD45+4 CD81+4 CD52+4 CD45RA+4 CD43+3 CD45RB+3 CD55+3 CD29+3 CD7+3 CD62L+2 CD38+2 CD28+2 CD5+2 CD4+2 CD49d+1 CD127+1 CD8a+1 ▼ None                |
|            |               |                  | 9              | 286          | 3209095 : ▲ CD99+9 CD57+8 CD29+8 CD43+6 CD147+6 CD3+5 CD56+5 CD81+4 CD52+4 CD45RA+4 CD45+3 CD49d+3 CD5+2 CD45RB+1 CD137+1 CD38+1 CD8a+1 CD4+1 ▼ None                                     |
|            |               |                  | 10             | 44           | 32010095 : ▲ CD99+9 CD57+8 CD29+8 CD147+7 CD43+5 CD45+4 CD3+4 CD81+4 CD52+4 CD49d+3 CD38+2 CD5+2 CD45RB+1 CD161+1 CD137+1 CD127+1 CD56+1 CD8a+1 CD4+1 ▼ None                             |
|            |               |                  | 11             | 108          | 32011095 : ▲ CD45RA+8 CD99+7 CD3+6 CD27+6 CD147+5 CD45+4 CD45RB+4 CD52+4 CD43+3 CD81+3 CD55+3 CD29+3 CD38+3 CD7+3 CD62L+2 CD28+2 CD5+2 CD127+1 CD56+1 CD8a+1 CD4+1 ▼ None                |
|            |               |                  | 12             | 22           | 32012095 : ▲ CD99+9 CD57+8 CD29+7 CD43+6 CD45RA+6 CD3+5 CD147+5 CD81+4 CD52+4 CD45+3 CD49d+3 CD45RB+2 CD5+2 CD137+1 CD56+1 CD8a+1 CD4+1 ▼ None                                           |
| COV34      | 1.093         | 0.472            | 1              | 41           | 3401095 : ▲ CD99+10 CD29+9 CD27+8 CD147+6 CD127+5 CD45+4 CD43+4 CD3+4 CD52+4 CD62L+4 CD5+4 CD81+3 CD55+2 CD28+2 CD7+2 CD4+2 CD45RB+1 CD137+1 CD56+1 CD8a+1 ▼ None                        |
|            |               |                  | 3              | 26           | 3403095 : ▲ CD29+9 CD99+9 CD27+7 CD3+6 CD147+6 CD45+4 CD52+4 CD62L+4 CD45RA+4 CD43+3 CD45RB+3 CD81+3 CD55+2 CD127+2 CD28+2 CD8a+2 CD5+2 CD7+2 CD25+1 CD161+1 CD137+1 CD56+1 CD4+1 ▼ None |
|            |               |                  | 2              | 18           | 340205 : ▲ CD99+7 CD27+6 CD147+5 CD45+4 CD3+4 CD52+4 CD62L+4 CD38+3 CD43+2 CD45RB+2 CD81+2 CD55+2 CD29+2 CD127+2 CD8a+2 CD5+2 CD56+1 CD28+1 CD7+1 CD4+1 ▼ None                           |
| COV35      | N/A           | N/A              | N/A            | N/A          | N/A                                                                                                                                                                                      |
| COV36      | N/A           | N/A              | N/A            | N/A          | N/A                                                                                                                                                                                      |
| COV37      | N/A           | N/A              | N/A            | N/A          | N/A                                                                                                                                                                                      |
| COV39      | 0.474         | 1.000            | 1              | 44           | 3901095 : ▲ CD29+10 CD147+10 CD99+10 CD45+6 CD49d+4 CD3+4 CD27+4 CD52+3 CD28+3 CD38+2 CD81+1 CD137+1 CD62L+1 CD56+1 CD5+1 CD4+1 ▼ None                                                   |
|            |               |                  | 2              | 11           | 3902095 : ▲ CD99+10 CD29+9 CD147+8 CD45+6 CD3+4 CD49d+3 CD52+3 CD38+3 CD27+2 CD28+2 CD81+1 CD137+1 CD56+1 CD5+1 CD4+1 ▼ None                                                             |
| COV40      | N/A           | N/A              | N/A            | N/A          | N/A                                                                                                                                                                                      |
| COV41      | N/A           | N/A              | N/A            | N/A          | N/A                                                                                                                                                                                      |

\*Red MEM labels denote that the CD4+ T cell hotspot is a region with ≥95% expansion and blue MEM labels denote that the CD4+ T cell hotspot is a region with ≥95% contraction after T-REX analysis when comparing Day 0 to Day 4 (±3 days)
