# Supplementary material
Source: PubMed Central journal article supplement (PMC7702274)
Supplement: media-5.pdf [file media-5.pdf]

**Supplemental Table 3: Fluorescent antibody panel and tetramer selection for the analysis of RV-specific CD4+ T cells**

| Surface Antibody Panel |                      |                |                             |
|------------------------|----------------------|----------------|-----------------------------|
| Fluorochrome           | Marker               | Clone          | Vendor                      |
| BB515                  | CD45RO               | UCHL1          | BD                          |
| FITC                   | Dump (CD14/CD19/CD8) | M5E2/HIB19/SK1 | Biologend                   |
| Spark Blue 550         | CD3                  | SK7            | Biologend                   |
| PE                     | Tetramer 1           | NA             | NA                          |
| PE-CF594               | Tetramer 2           | NA             | NA                          |
| PE-Cy5                 | Tetramer 3           | NA             | NA                          |
| PerCP-Cy5.5            | CD95                 | DX2            | Biologend                   |
| PE-AF700               | CD25                 | CD25-3G10      | Thermo Fisher               |
| PE-Cy7                 | CXCR5                | J252D4         | Biologend                   |
| APC                    | Ki-67                | 20Raj1         | Thermo Fisher               |
| AF647                  | Tcf-1                | C63D9          | Cell Signaling Technologies |
| APC-Cy5.5              | CD38                 | HIT2           | Thermo Fisher               |
| Zombie Near IR         | Live/Dead            | NA             | Biologend                   |
| APC-Fire 750           | CCR7                 | G043H7         | Biologend                   |
| BUV 737                | CD45RA               | H100           | BD                          |
| BV421                  | CCR6                 | G034E3         | Biologend                   |
| Pacific Blue           | ICOS                 | C398.4A        | Biologend                   |
| BD Horizon BV480       | CXCR3                | 1C6            | BD                          |
| BV570                  | CD27                 | O323           | Biologend                   |
| BV605                  | CCR5                 | 2D7            | BD                          |
| BV650                  | CD4                  | OKT4           | Biologend                   |
| BV711                  | Tbet                 | 4B10           | Biologend                   |
| BV750                  | CD127                | HIL-7R-M21     | BD                          |
| BV786                  | PD-1                 | EH12.1         | BD                          |

| Tetramer Selection |        |                                   |                               |                               |
|--------------------|--------|-----------------------------------|-------------------------------|-------------------------------|
| Subject ID         | # Tets | PE Tetramer (DRB1)                | PE-CF594 Tet (DRB1)           | PE-Cy5 Tetramer (DRB1)        |
| RV001              | 3      | RV VP2 <sub>P3</sub> (*0404)      | RV VP2 <sub>P25</sub> (*1501) | RV VP1 <sub>P18</sub> (*0404) |
| RV002              | 3      | RV VP2 <sub>P24</sub> (*0101)     | RV VP2 <sub>P21</sub> (*0301) | RV VP1 <sub>P23</sub> (*0101) |
| RV003              | 1      | Empty                             | RV VP2 <sub>P25</sub> (*1501) | Empty                         |
| RV004              | 2      | Empty                             | RV VP1 <sub>P18</sub> (*0404) | RV VP2 <sub>P3</sub> (*0404)  |
| RV005              | 1      | Empty                             | RV VP2 <sub>P2</sub> (*1101)  | Empty                         |
| RV006              | 2      | Empty                             | RV VP1 <sub>P23</sub> (*0701) | RV VP2 <sub>P26</sub> (*0701) |
| RV007              | 2      | Flu HA <sub>307-319</sub> (*1101) | RV VP2 <sub>P2</sub> (*1101)  | Empty                         |
| RV008              | 1      | Empty                             | RV VP2 <sub>P21</sub> (*0301) | Empty                         |

\*For full details of rhinovirus tetramers refer to Muehling et al, JI 2016
